# Supplementary material for: Ordenación del frente marítimo del puerto de Alcudia
Source: MDPI journal article supplement (doi:10.3390/jpm12091447), 2004-01-01
Supplement: s1 [file s1]

## Supplementary Materials

### Effect of Ketamine on ECoG Power

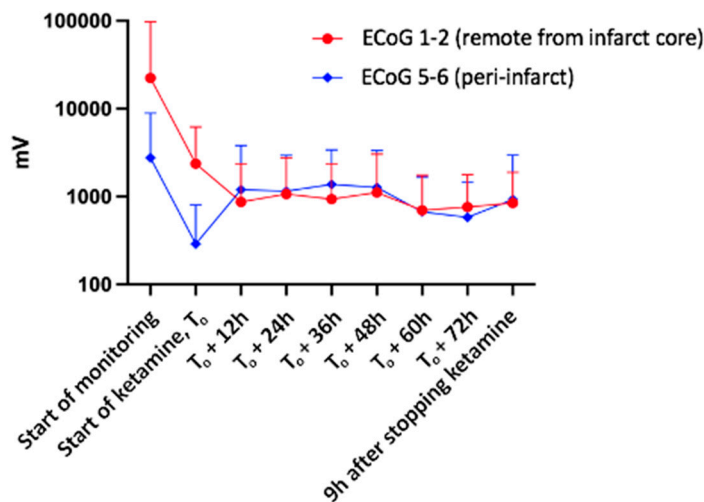

**Figure S1.** Effect of ketamine on the power of ECoG. Prior to administration of ketamine, ECoG power in peri-infarct tissue is substantially lower than that in remote tissue. After the start of ketamine, there is improvement in ECoG power in the peri-infarct region to a level similar to that of remote tissue. Data analysis modeled after previous studies [1,2]. .

### Supplemental References:

1. Reinhart, K.M.; Shuttleworth, C.W. Ketamine reduces deleterious consequences of spreading depolarizations. *Exp. Neurol.* **2018**, *305*, 121–128. <https://doi.org/10.1016/j.expneurol.2018.04.007>.
2. Reinhart, K.M.; Humphrey, A.; Brennan, K.C.; Carlson, A.P.; Shuttleworth, C.W. Memantine Improves Recovery after Spreading Depolarization in Brain Slices and can be Considered for Future Clinical Trials. *Neurocrit. Care* **2021**, *35* (Suppl. 2), 135–145. <https://doi.org/10.1007/s12028-021-01351-9>.
